# Supplementary material
Source: publisher site journal article supplement (https://www.dovepress.com/article/380316)

Appendix Figure 1

NAME: [REDACTED]  
 Ausbildung: [REDACTED] Geburtsdatum: [REDACTED]  
 Geschlecht: [REDACTED] DATUM: [REDACTED]

**MONTREAL COGNITIVE ASSESSMENT (MOCA)**  
 Alternative Version 2

| VISUOSPATIAL / EXEKUTIV                                                                                                                                                             |                                                                                                               |                                                                                                                                                                                                                                                                                                                   |                                                                                                           |                                                                                                           |                                                                                                          |                                                                                               | PUNKTE |
|-------------------------------------------------------------------------------------------------------------------------------------------------------------------------------------|---------------------------------------------------------------------------------------------------------------|-------------------------------------------------------------------------------------------------------------------------------------------------------------------------------------------------------------------------------------------------------------------------------------------------------------------|-----------------------------------------------------------------------------------------------------------|-----------------------------------------------------------------------------------------------------------|----------------------------------------------------------------------------------------------------------|-----------------------------------------------------------------------------------------------|--------|
| GEDÄCHTNIS<br>Wortliste vorlesen, wiederholen lassen.<br>2 Durchgänge. Nach 5 Minuten überprüfen (s.u.)                                                                             | LASTWAGEN<br><input checked="" type="checkbox"/> 1. Versuch<br><input checked="" type="checkbox"/> 2. Versuch | BANANE<br><input checked="" type="checkbox"/> 1. Versuch<br><input checked="" type="checkbox"/> 2. Versuch                                                                                                                                                                                                        | GEIGE<br><input checked="" type="checkbox"/> 1. Versuch<br><input checked="" type="checkbox"/> 2. Versuch | TISCH<br><input checked="" type="checkbox"/> 1. Versuch<br><input checked="" type="checkbox"/> 2. Versuch | GRÜN<br><input checked="" type="checkbox"/> 1. Versuch<br><input checked="" type="checkbox"/> 2. Versuch | Keine Punkte                                                                                  |        |
| <b>AUFMERKSAMKEIT</b> Zahlenliste vorlesen (1 Zahl/ Sek.) In der vorgegebenen Reihenfolge wiederholen                                                                               |                                                                                                               | <input checked="" type="checkbox"/> 3 2 9 6 5<br><input checked="" type="checkbox"/> 8 5 2                                                                                                                                                                                                                        |                                                                                                           |                                                                                                           |                                                                                                          |                                                                                               | 2/2    |
| <b>BENENNEN</b>                                                                                                                                                                     |                                                                                                               | <input checked="" type="checkbox"/> FBACMNAAJKLBAFAKDEAAAJAMOF AAB                                                                                                                                                                                                                                                |                                                                                                           |                                                                                                           |                                                                                                          |                                                                                               | 1/1    |
| <b>SPRACHE</b> Wiederholen: Ein Vogel kann in geschlossene Fenster fliegen, wenn es dunkel und windig ist.<br>Die liebevolle Großmutter schickte Lebensmittel vor über einer Woche. |                                                                                                               | <input checked="" type="checkbox"/> 83 <input checked="" type="checkbox"/> 76 <input checked="" type="checkbox"/> 69 <input checked="" type="checkbox"/> 62 <input checked="" type="checkbox"/> 55<br><small>4 oder 5 korrekte Ergebnisse: 3 P., 2 oder 3 korrekt: 2 P., 1 korrekt: 1 P., 0 korrekt: 0 P.</small> |                                                                                                           |                                                                                                           |                                                                                                          |                                                                                               | 1/3    |
| <b>ABSTRAKTION</b> Gemeinsamkeit von z.B. Banane - Apfelsine = Frucht                                                                                                               |                                                                                                               | <input checked="" type="checkbox"/> Diamant - Rubin <input checked="" type="checkbox"/> Kanone - Gewehr                                                                                                                                                                                                           |                                                                                                           |                                                                                                           |                                                                                                          |                                                                                               | 2/2    |
| <b>ERINNERUNG</b> Worte erinnern OHNE HINWEIS                                                                                                                                       |                                                                                                               | <input checked="" type="checkbox"/> LASTWAGEN <input checked="" type="checkbox"/> BANANE <input checked="" type="checkbox"/> GEIGE <input checked="" type="checkbox"/> TISCH <input checked="" type="checkbox"/> GRÜN                                                                                             |                                                                                                           |                                                                                                           |                                                                                                          |                                                                                               | 0/5    |
| <b>Optional</b> Hinweis zu Kategorie Mehrfachauswahl                                                                                                                                |                                                                                                               | <input checked="" type="checkbox"/>                                                                                                                               |                                                                                                           |                                                                                                           |                                                                                                          |                                                                                               |        |
| <b>ORIENTIERUNG</b>                                                                                                                                                                 |                                                                                                               | <input checked="" type="checkbox"/> Datum <input checked="" type="checkbox"/> Monat <input checked="" type="checkbox"/> Jahr <input checked="" type="checkbox"/> Wochentag <input checked="" type="checkbox"/> Ort <input checked="" type="checkbox"/> Stadt                                                      |                                                                                                           |                                                                                                           |                                                                                                          |                                                                                               | 3/6    |
| © Z. Nasreddine MD deutsche Adaptation (2012) K Reetz, MD and A Costa<br>Untersucher: _____                                                                                         |                                                                                                               |                                                                                                                                                                                                                                                                                                                   |                                                                                                           |                                                                                                           |                                                                                                          | Normal $\geq 26 / 30$<br><b>TOTAL</b> _____ / 30<br>+ 1 Punkt wenn $\leq 12$ Jahre Ausbildung |        |

17/30

Notes: MoCA© test reprinted with permission from MoCA TEST Inc.

**Appendix table 1: Neurologic examination at readmission in July 2020**

|                |                                                                                                                                                                                                                                                                                                                                                                                           |
|----------------|-------------------------------------------------------------------------------------------------------------------------------------------------------------------------------------------------------------------------------------------------------------------------------------------------------------------------------------------------------------------------------------------|
| Mental status  | <p>Awake but drowsy oriented to person, disoriented in time and place.</p> <p>Speech: Slowed down, partially incoherent and with perseveration, naming and repetition not evaluated</p> <p>Affect: Normal. Attention: Normal attention span.</p> <p>Memory: Short-term memory partially impaired (could not recall all details of the admission day) long-term memory appears normal.</p> |
| Cranial nerves | <p>II-XII without pathologies ( cursory exam). Minimal saccades but no pathologic nystagmus.</p>                                                                                                                                                                                                                                                                                          |
| Motor          | <p>Facial motoric intact. strength 5/5 throughout all 4 extremities, higher muscle tone in upper extremity, hyperkinesia of feet. No pronator drift of out-stretched arms.</p>                                                                                                                                                                                                            |
| Reflexes       | <p>Responsive and symmetric palmomental, glabella, biceps, triceps, knee and ankle. Babinski downgoing in both feet.</p>                                                                                                                                                                                                                                                                  |
| Sensory        | <p>Intact to pin prick in all 4 extremities and face bilaterally</p>                                                                                                                                                                                                                                                                                                                      |
| Coordination   | <p>Fine finger movements intact. No dysmetria on finger-to-nose or knee-to-heel. Romberg negative.</p>                                                                                                                                                                                                                                                                                    |
| Gait           | <p>Insecure, heel and toe walking impossible.</p>                                                                                                                                                                                                                                                                                                                                         |

**Appendix table 2: Extended laboratory analyses at readmission in July 2020**

| <i>marker</i>                | <i>result</i> | <i>measure</i> | <i>reference</i> |
|------------------------------|---------------|----------------|------------------|
| <b>Vitamins</b>              |               |                |                  |
| Vitamin B1                   | 44            | ug/l           | 28-85            |
| Vitamin B6                   | 20.3          | ug/l           | 8.7-27.2         |
| <b>Endocrinology</b>         |               |                |                  |
| TPO-Ak                       | <1            | U/ml           | <5.6             |
| TSH-Receptor-Ak              | <1.0          | IU/l           | <1               |
| <b>Serology</b>              |               |                |                  |
| T.pallidum IgG/igM           | <0.1          | index          | <1               |
| HIV-Screening (4.Gen)        | negative      | index          | negative         |
| Borr. burgd. IgG             | negative      | index          | negative         |
| Borr. burgd. IgM             | negative      | index          | negative         |
| <b>Autoimmunity</b>          |               |                |                  |
| Antinucleic antibodies       | < 80          | Titer          | < 80             |
| Anticytoplasmatic antibodies | 80            | Titer          | < 80             |
| ANCA                         | <40           | Titer          | <40              |
| PR3 (cANCA)                  | <1            | IU/ml          | <2               |
| MPO (pANCA)                  | <1            | IU/ml          | <4               |
| <b>Immunology</b>            |               |                |                  |
| IgG                          | 7.51          | g/l            | 7.0-16.00        |
| IgA                          | 2.14          | g/l            | 0.7-4.00         |
| IgM                          | 0.76          | g/l            | 0.40-2.80        |
| free kappa light chains      | 11.6          | mg/l           | 3.3 - 19.4       |
| free lambda light chains     | 11.5          | mg/l           | 5.7 - 26.3       |
| ratio kappa/lambda (free)    | 1.01          |                | 0.26-1.65        |
| <b>Liquor (CSF)</b>          |               |                |                  |
| Albumin (serum)              | 33.4          | g/l            | 37.9-52          |
| Albumin (liquor)             | 125           | mg/l           | <350             |

|                                   |                  |        |           |
|-----------------------------------|------------------|--------|-----------|
| Albumin quotient                  | 3.7              | x 10*3 | 9.1       |
| IgG (serum)                       | 7.67             | g/l    | 6.1-16.2  |
| IgG (liquor)                      | 13               | mg/l   | <34       |
| IgG quotient                      | 1.7              | x 10*3 |           |
| IgA (serum)                       | 2.38             | g/l    | 0.9-0.5   |
| IgA (liquor)                      | 1.8              | mg/l   | <5.0      |
| IgA quotient                      | 0.8              | x 10*3 |           |
| IgM (serum)                       | 0.94             | g/l    | 0.4-2.4   |
| IgM (liquor)                      | 0.1              | mg/l   | <1.3      |
| IgM quotient                      | 0.1              | x 10*3 |           |
| free kappa light chains (liquor)  | 0.2              | mg/l   | <0.1-2.0  |
| free lambda light chains (liquor) | 0.2              | mg/l   | <.01-0.4) |
| ratio kappa(lambda (free, liquor) | 1                |        |           |
| kappa quotient                    | 0                | x 10*3 |           |
| lambda quotient                   | 0                | x 10*3 |           |
| Oligoclonal bands                 | negative         |        |           |
| Anti-NMDA-Receptor (liquor)       | negative         | Titer  | negative  |
| Anti-LGI1 (VGKC) (liquor)         | positive (1:3.2) | Titer  | negative  |
| Anti-CASPR2 (VGKC) (liquor)       | negative         | Titer  | negative  |
| <b>Dementia</b>                   |                  |        |           |
| Tau-protein                       | 586              | pg/ml  | <445      |
| Phospho-Tau (pTa 181)             | 32               | pg/ml  | < 61.0    |
| Beta-Amyloid (1-42)-protein       | 355              | pg/ml  | > 375     |
| Amyloid Abeta (1-40)              | 5454             | pg/ml  |           |
| Ratio Abeta/43x 10/Abeta40        | 0.65             |        | >0.54     |
| 14-3-3 protein                    | negative         |        |           |
| CXCL13                            | <0.1             | pg/ml  | <20       |
| RT-QulC                           | negative         |        |           |

**Appendix Figure 2**

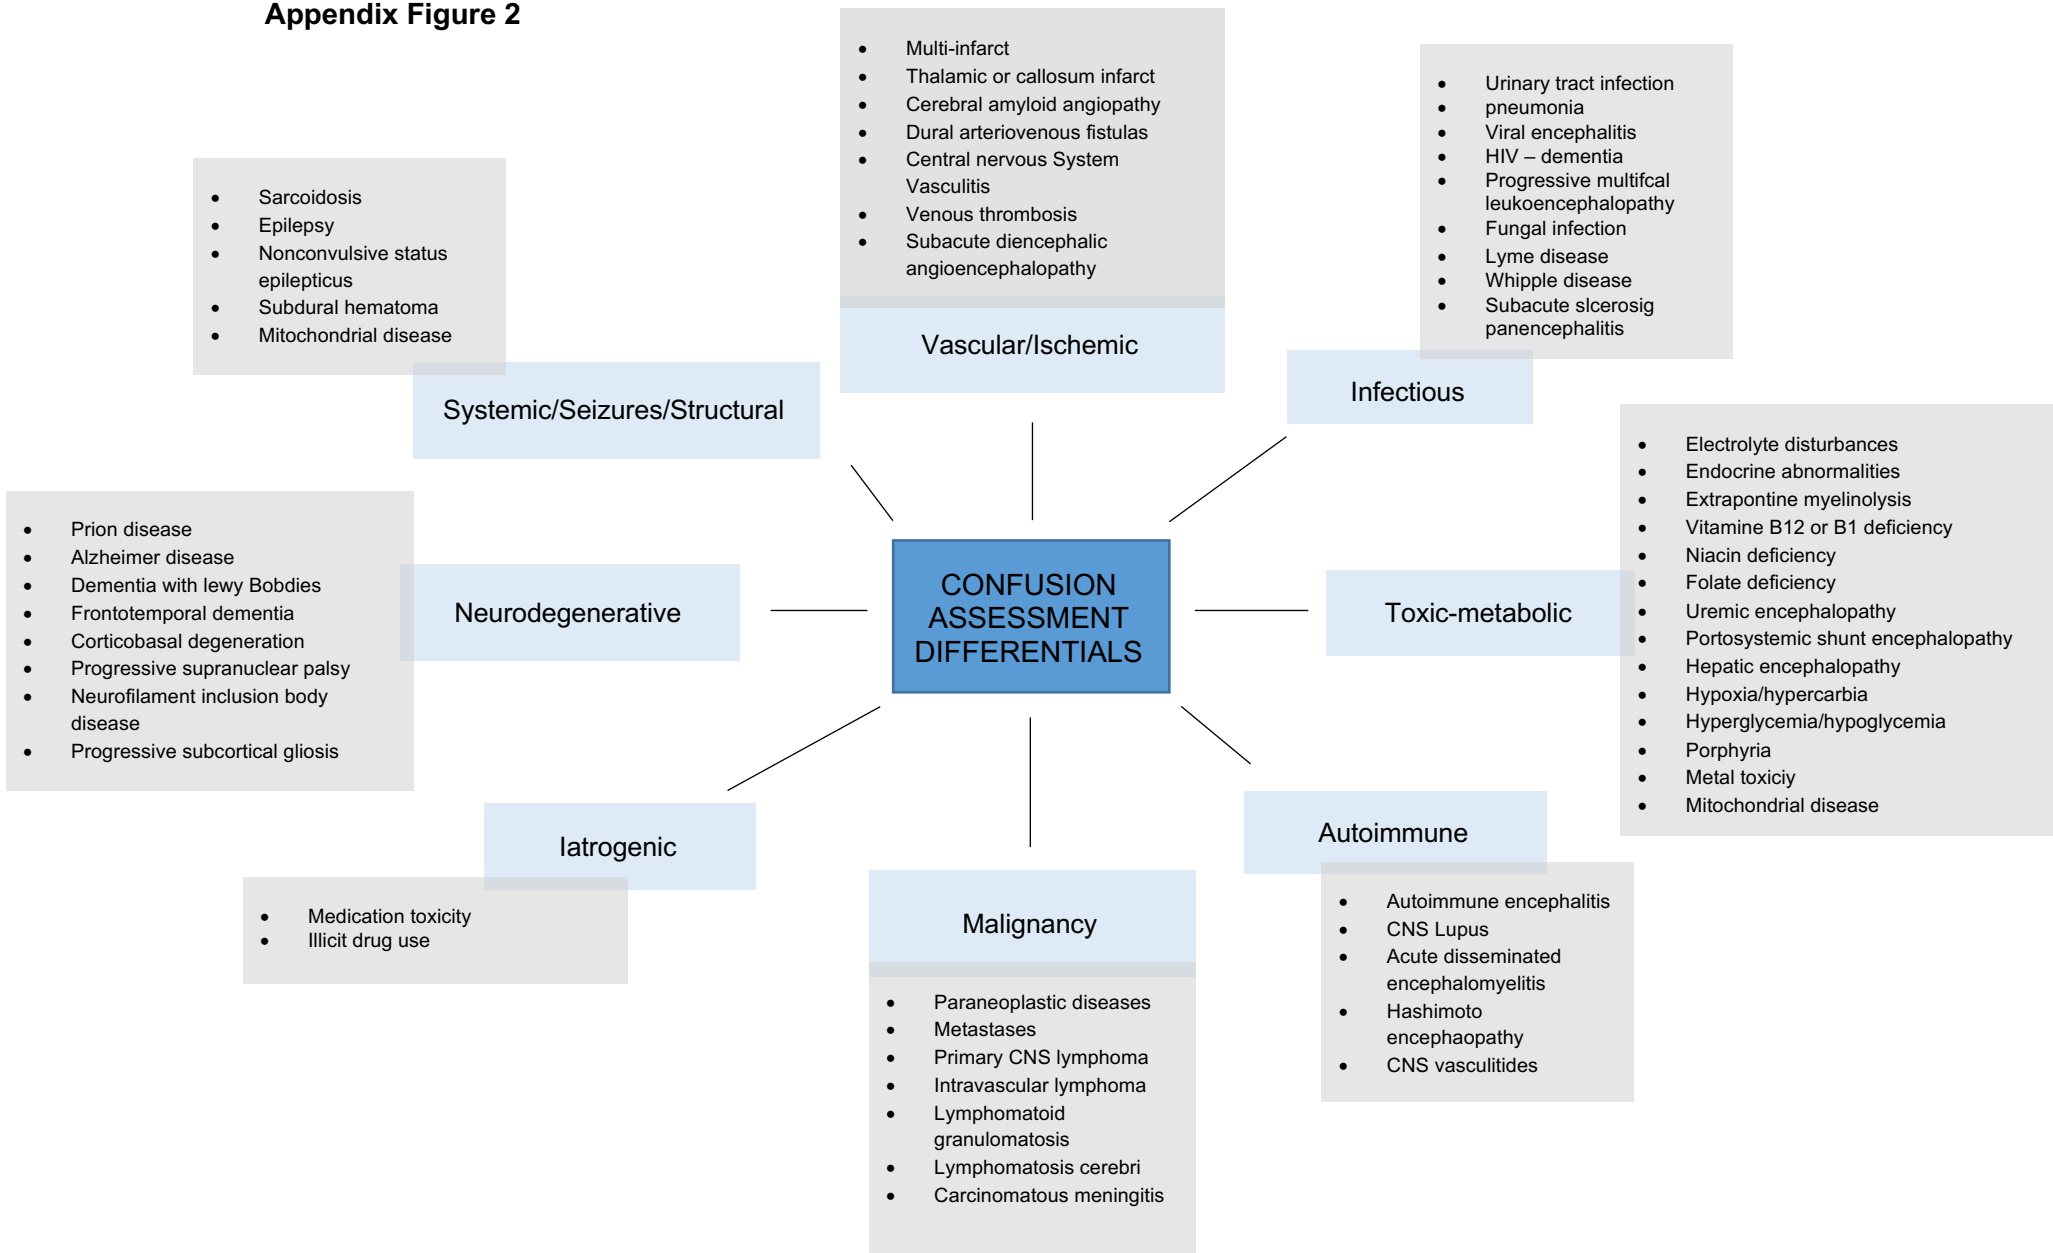

Supplement: Supplementary file 1 [file get_supplementary_file.php]
